# Supplementary material for: Neuropeptide Bursicon and its receptor-mediated the transition from summer-form to winter-form of Cacopsylla chinensis
Source: eLife. 2024 Nov 8;13:RP97298. doi: 10.7554/eLife.97298 (PMC11548876; doi:10.7554/eLife.97298)
Supplement: Supplementary file 1. — (a) List of primers used in this study. (b) Comparison of pigmentation and cuticle thickness after CcTRPM, CcBurs-a, CcBurs-β, and CcBurs-R knockdown. [file elife-97298-supp1.docx]

**Supplementary File 1**

**Neuropeptide Bursicon and its receptor mediated the** **transition from** **summer-form to** **winter-form of *Cacopsylla chinensis***

Zhixian Zhang1, Jianying Li1, Yilin Wang1, Zhen Li1, Xiaoxia Liu1,Songdou Zhang1,2,*

1Department of Entomology and MOA Key Lab of Pest Monitoring and Green Management, College of Plant Protection, China Agricultural University, 100193 Beijing, China

2Sanya Institute of China Agricultural University, 572025 Sanya City, Hainan Province, China

***Corresponding author**: Songdou Zhang.

**Email:** zhangsongdou1128@126.com

**Supplementary file 1a. List of primers used in this study.**

| **Gene name and GenBank ID** | **Forward Primer (5'-3')** | **Reverse Primer (5'-3')** | **Product size (bp)** | **Application purpose** |
| --- | --- | --- | --- | --- |
| *CcBurs-α*  (OR488624) | Full-F: CACATGTCGGACGGTATAA | Full-R: GCCACTCAATCTCTTCAGAC | 505 | Full-length cDNA cloning |
| RNAi-F1: ggatcctaatacgactcactatagg  AGTGTGTCTTCTGTTACCCCT | RNAi-R1: ggatcctaatacgactcactatagg  CACTAGCCTCTCTTTCTCCACT | 326 | dsRNA synthesis |
| qF: TACAAGCATTGAGGAGAG | qR: TCATTCTGACTTGGCAAA | 94 | qPCR |
| pcDNA3.1-his-mCherry-F1: ccactagtccagtgtggtggaattc  GGCCGCATCTTCTGGTAAA | pcDNA3.1-his-mCherry-R1: gtttaaacgggccctctagactcgag  CACTTAGTGATGGTGATGGTG | 114 | Reduced gel |
| pcDNA3.1-CcBurs-α-his-mCherry-F2: ctagcgtttaaacttaagctt  GCCACCATGTCGGACGGTATAATGAACA | pcDNA3.1-CcBurs-α-his-mCherry-R2: ccacactggactagtggatcc  TTCTGACTTGGCAAAATGTCC | 547 | Reduced gel |
| pcDNA3.1-CcBurs-α-his-P2A-mCherry-F3: gctggctagcgtttaaacttaagctt  GCCACCATGTCGGACGGTAT | pcDNA3.1-CcBurs-α-his-P2A-mCherry-R3: tccgcttccggtaccaagctt  GTGATGGTGATGGTGATGGTGGTG | 665 | Reduced gel |
| pcDNA3.1-CcBurs-α-his-P2A-mCherry-F1: TGGTGCACGTGGAAGCTTCCAACATTTCAGTCTCATCAGCC | pcDNA3.1-CcBurs-α-his-P2A-mCherry-R1: AGGCAGCTGGCGCGCTCCATGGTGGCAAGCTTAAGTTTAAAC | 6938 | Non-reduced gel |
| pcDNA3.1-CcBurs-α-his-P2A-mCherry-F2:  GCTGCTGCTGCTGCTCCCCCTGGTGCACGTGGAAGCTTCC | pcDNA3.1-CcBurs-α-his-P2A-mCherry-R2:  GGGGGAGCAGCAGCAGCAGCAGGCAGCTGGCGCGCTCCAT | 6958 | Non-reduced gel |
|  | Full-F: TTGTACACAAGCAATAATGTCC | Full-R: ACGTCATGAGTGACACAAAC | 446 | Full-length cDNA cloning |
| *CcBurs-β*  (OR488625) | RNAi-F1: ggatcctaatacgactcactatagg  TCCTTTTGTTTGAAATGGGCTCT | RNAi-R1: ggatcctaatacgactcactatagg  GGAAACTTTCTCGACAGCAGT | 336 | dsRNA synthesis |
| qF: GTGAGAAGATGGCAACATTAGA | qR: GCGAATAATCTCCACACTTGTA | 78 | qPCR |
| pcDNA3.1-P2A-mCherry-F1: tttaaacttaagcttggtacc  GGAAGCGGAGCTACTAACTTCAGCCTG | pcDNA3.1-P2A-mCherry-R1: gctcaccatggtggcggtacc  AGGTCCAGGGTTCTCCTCCACG | 108 | Reduced gel |
| pcDNA3.1-CcBurs-β-his-mCherry-F2: ctagcgtttaaacttaagctt  GCCACCATGTCCTTTTGTTTGAAATGGG | pcDNA3.1- CcBurs-β-his-mCherry-R2: ccacactggactagtggatcc  TCGCGAATAATCTCCACACT | 408 | Reduced gel |
| pcDNA3.1-CcBurs-β-his-P2A-mCherry-F3: gctggctagcgtttaaacttaagctt  GCCACCATGTCCTTTTGTTTGAAATGG | pcDNA3.1-CcBurs-β-his-P2A-mCherry-R3: tccgcttccggtaccaagctt  GTGATGGTGATGGTGATGGTGGTG | 590 | Reduced gel |
| pcDNA3.1-CcBurs-β-his-P2A-mCherry-F1: TGGTGCACGTGGAAGCTTCCGAAAAGGACGAGGCTTGT | pcDNA3.1-CcBurs-β-his-P2A-mCherry-R1:  AGGCAGCTGGCGCGCTCCATGGTGGCAAGCTTAAGTTTAAAC | 6863 | Non-reduced gel |
| pcDNA3.1-CcBurs-β-his-P2A-mCherry-F2:  GCTGCTGCTGCTGCTCCCCCTGGTGCACGTGGAAGCTTCC | pcDNA3.1-CcBurs-β-his-P2A-mCherry-R2:  GGGGGAGCAGCAGCAGCAGCAGGCAGCTGGCGCGCTCCAT | 6883 | Non-reduced gel |
| *CcBurs-R*  (OR488626) | Full-F: TTTCATCGTCGTTTGGAGAT | Full-R: CCCGAAAGTATCCCATAGTG | 1758 | Full-length cDNA cloning |
| RNAi-F1: ggatcctaatacgactcactatagg  ATCTGACCCAATTGAGGAAC | RNAi-R1: ggatcctaatacgactcactatagg  CCGTCCGGTATGTATTTGAT | 371 | dsRNA synthesis |
| orf-F1 | orf-R1 |  |  |
| AGGTCTATATAAGCAGAGCTC | AGGTCTATATAAGCAGAGCTC | 1811 | Amplification of |
| ATGAAGAAAACGTCATTTTTAATA | ATCAATACCCGGAGTCAAATGA |  | orf sequence |
| qF: CCTCAGCAAACTACAAGTCT | qR: GCCCAGGTTCAAATCTTCTA | 103 | qPCR |
| 3'UTR-Full-F1: tctagttgtttaaacgagctc  CGCTTGGCATAGTTCCATAT | 3'UTR-Full-R1: cctgcaggtcgactctaga  GGTACCTAACCTACCCAGAT | 599 | Application of  3'UTR Full sequence |
| 3'UTR-Mut-F1: tctagttgtttaaacgagctc  TTGTTCCCACTTCTTCCTGGAA | 3'UTR-Mut-R1: cctgcaggtcgactctaga  GGTACCTAACCTACCCAGAT | 382 | Application of  3'UTR mutant sequence |
| *CcTRPM*  (OQ658558) | RNAi-F: ggatcctaatacgactcactatagg  GGTACCTTCGTATCCTCAAC | RNAi-F: ggatcctaatacgactcactatagg  TGGCATTGATCTCCATGAAA | 472 | dsRNA synthesis |
|  | qF: ACAATGCATTCTTCTTGACC | qR: GACTTTGTACACTGGGGGTA | 141 | qPCR |
| *EGFP*  (ACY56286) | RNAi-F: ggatcctaatacgactcactatagg  ACTCCAGCAGGACCATGTGATC | RNAi-F: ggatcctaatacgactcactatagg  CCTGAAGTTCATCTGCACCAC | 596 | dsRNA synthesis |
| *CcTre1*  (OQ734934) | qF: GGAACTCCCTCCTCTATGTT | qR: CCAATAGTCAGCCAATCTGT | 147 | qPCR |
| *CcCHS1*  (OQ658570) | qF: AGAAGAGAAGAAACAGCAGG | qR: TAGTGTCCAATCGTTTCTCC | 233 | qPCR |
| *Ccβ-actin*  (OQ658571) | qF: CGTATGCAGAAGGAAATCAC | qR: AGATCCACATCTGTTGGAAG | 139 | qPCR |
| miR-6012 | qF: TTCGGCGATGAGATCAGCCAGT | - | - | qPCR |
| U6 | qF:AGGATGACACGCAAAATCGT | - | - | qPCR |

**Supplementary file 1b. Comparison of pigmentation and cuticule thickness after *CcTRPM*, *CcBurs-a*, *CcBurs-β*, and *CcBurs-R* knockdown.**

|  | **dsEGFP** | **dsCcTRPM** | **dsCcBurs-a** | **dsCcBurs-β** | **dsBurs-R** |
| --- | --- | --- | --- | --- | --- |
| Pigmentation  (absorbance at 300nm) | 0.8499 ± 0.0532a | 0.1779 ± 0.0059b | 0.1846 ± 0.0203b | 0.1931 ± 0.0309b | 0.1410 ± 0.0131b |
| Cuticule thickness  (μm) | 3.39 ± 0.20a | 1.75 ± 0.09b | 1.44 ± 0.12b | 1.54 ± 0.15b | 1.34 ± 0.13b |
